# Supplementary material for: Keeping a Completely Autotrophic Nitrogen Removal over Nitrite System Effective in Treating Low Ammonium Wastewater by Adopting an Alternative Low and High Ammonium Influent Regime
Source: Hindawi journal article supplement (doi:10.1155/2018/9536761), 2018-01-01
Supplement: f1 [file 9536761.f1.pdf]

## **Supporting Information**

**Keeping a completely autotrophic nitrogen removal over nitrite (CANON)  
system effective in treating low ammonium wastewater adopting an alternative  
low and high-ammonium influent regime**

Chang Qinglong, Weigang Wang, Jie Chen, Yayi Wang\*

State Key Laboratory of Pollution Control and Resources Reuse, College of  
Environmental Science and Engineering, Tongji University, Siping Road, Shanghai  
200092, P. R. China

\*Corresponding author. E-mail:

[wyywater@126.com](mailto:wyywater@126.com); [yayi.wang@tongji.edu.cn](mailto:yayi.wang@tongji.edu.cn)

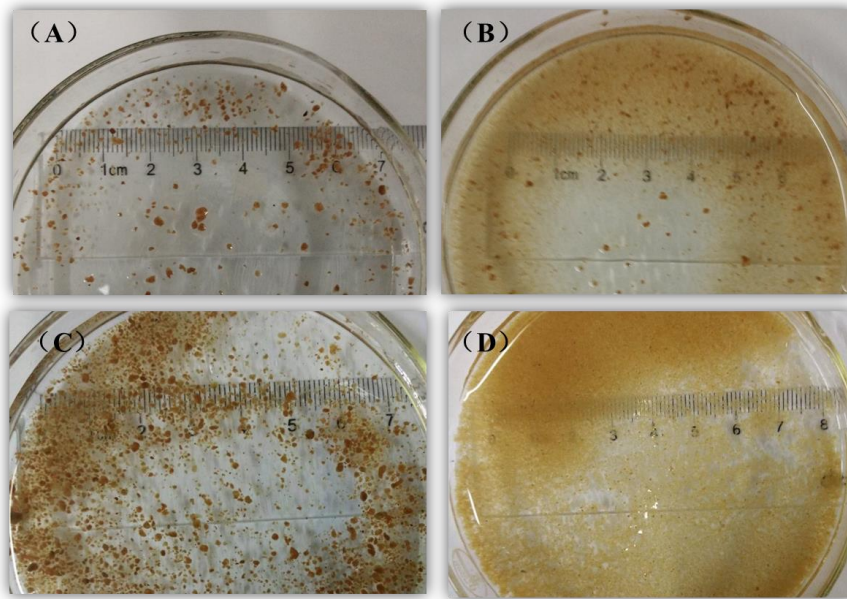

**Fig. S1.** The anammox granule of seeding CANON sludge (A); seeding CANON sludge (B); anammox granule after sieving on day 124 (C); flocs after sieving on day 124 (D).

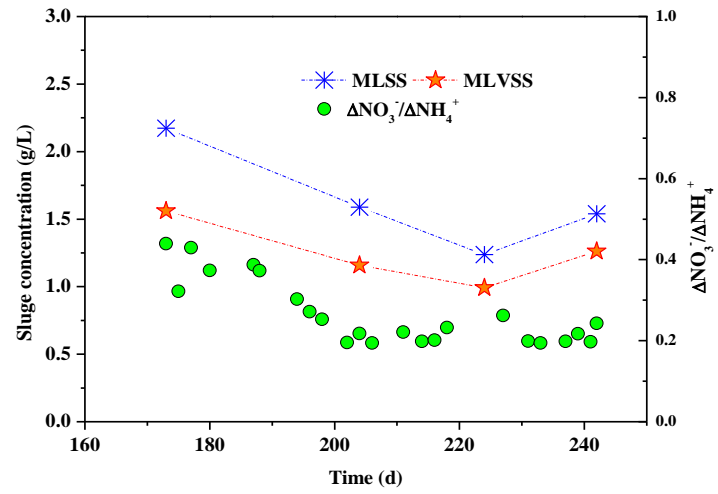

**Fig. S2** Changes in the MLSS, MLVSS and  $\Delta\text{NO}_3^-/\Delta\text{NH}_4^+$  ratio over the operation of Phase high II.

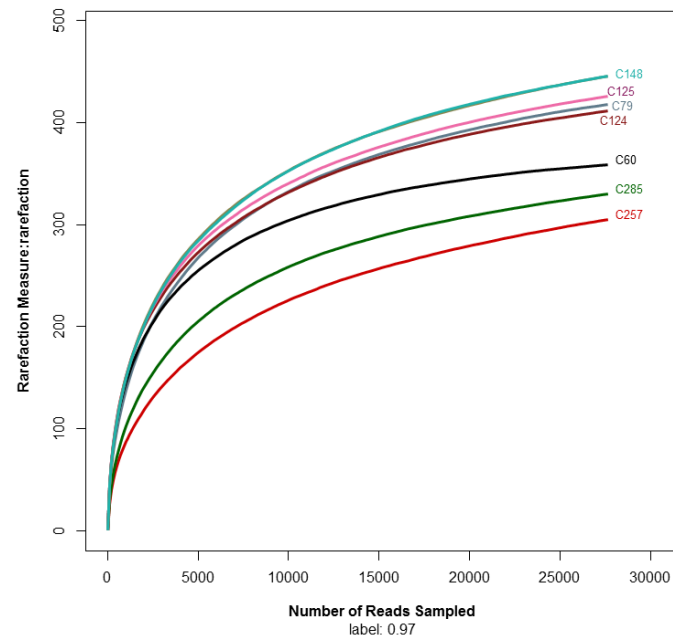

**Fig. S3** Rarefaction curve.

**Table S1** Microbial community richness and diversity index of sludge samples

| Sludge     | Sequence | OTU     | ACE   | Chao  | Shannon | Simpson | Coverage |
|------------|----------|---------|-------|-------|---------|---------|----------|
| sample No. | Reads    | numbers | Index | Index | Index   | Index   |          |
| C60        | 27631    | 359     | 378   | 378   | 4.03    | 0.0451  | 0.9986   |
| C79        | 27631    | 426     | 482   | 482   | 4.07    | 0.0489  | 0.9972   |
| C124       | 27631    | 411     | 453   | 447   | 4.06    | 0.0441  | 0.9977   |
| C125       | 27631    | 445     | 507   | 530   | 3.92    | 0.0563  | 0.9969   |
| C148       | 27631    | 445     | 506   | 510   | 4.02    | 0.0474  | 0.9970   |
| C257       | 27631    | 305     | 377   | 382   | 2.64    | 0.2268  | 0.9971   |
| C285       | 27631    | 330     | 374   | 383   | 3.09    | 0.1277  | 0.9976   |
